# Supplementary material for: Electronic Discharge Communication Tools Used in Pediatric Emergency Departments: Systematic Review
Source: JMIR Pediatr Parent. 2022 Jun 24;5(2):e36878. doi: 10.2196/36878 (PMC9270703; doi:10.2196/36878)
Supplement: Multimedia Appendix 3 [file pediatrics_v5i2e36878_app3.docx]

**Table S1.** ED visit presenting concern by primary technology modality.

| Condition targeted | Kiosk | Video | Phone | Web | Computer | Text | Othera |
| --- | --- | --- | --- | --- | --- | --- | --- |
| Head injury |  |  |  |  |  |  |  |
| Asthma |  |  |  |  |  |  |  |
| Otitis media |  |  |  |  |  |  |  |
| Fever |  |  |  |  |  |  |  |
| Fracture |  |  |  |  |  |  |  |
| Multipleb |  |  |  |  |  |  |  |
| Nonspecificc |  |  |  |  |  |  |  |
| Otherd |  |  |  |  |  |  |  |

a Other includes photodocumentation, games and other types of technologies

bCases where the same tool could be used for more than one condition and those conditions were listed.

cCases where the tool could be used for any condition.

dCases where the tool was used for a specific condition not captured under head injury, asthma, otitis media, fever, or fracture.

**Table S2.** ED visit presenting concern by primary technology modality frequencies

| Condition Targeted | Kiosk | Video | Phone | Web | Comp. | Text | Other |
| --- | --- | --- | --- | --- | --- | --- | --- |
| Head Injury | 1 | 1 | 0 | 1 | 0 | 0 | 0 |
| Asthma | 5 | 5 | 1 | 0 | 1 | 2 | 1 |
| Otitis Media | 0 | 1 | 2 | 0 | 0 | 0 | 0 |
| Fever | 0 | 2 | 0 | 1 | 3 | 0 | 0 |
| Fracture | 0 | 1 | 0 | 0 | 1 | 1 | 0 |
| Multiple | 2 | 3 | 2 | 0 | 0 | 0 | 0 |
| Non-Specific | 2 | 3 | 2 | 1 | 0 | 2 | 1 |
| Other | 1 | 4 | 0 | 0 | 0 | 1 | 1 |
